## Articles of interest in other COB journals

### From *Journal of Cell Science*

#### **The small chromatin-binding protein p8 coordinates the association of anti-proliferative and pro-myogenic proteins at the myogenin promoter**

Ramkumar Sambasivan, Sirisha Cheedipudi, NagaRekha Pasupuleti, Amena Saleh, Grace K. Pavlath and Jyotsna Dhawan

Sambasivan, R. et al. 2009. *J. Cell Sci.* doi:10.1242/jcs.048678

#### **Sox2 is dispensable for the reprogramming of melanocytes and melanoma cells into induced pluripotent stem cells**

Jochen Utikal, Nimet Maherali, Warakorn Kulalert and Konrad Hochedlinger

Utikal, J. et al. 2009. *J. Cell Sci.* doi:10.1242/jcs.054783
